# Supplementary material
Source: PubMed Central journal article supplement (PMC8370845)
Supplement: NIHMS843361-supplement-supplemental_figures.pdf [file NIHMS843361-supplement-supplemental_figures.pdf]

1 **Supplementary Figure Legends**

2 **Supplementary Figure 1:** Env quantitation of VLPs and Timeline of long-term immune study

3 (A) Western blot of recombinant HIV<sub>BAL</sub> gp120 at the indicated concentrations and 3 independent  
4 preparations of VLPs (8 mg/ml) diluted 1:200 in RIPA buffer. Densitometric measurement of  
5 diluted VLPs yielded an average concentration of 56 ng/ml ( $56 \text{ ng/ml} * 200 = 11.2 \text{ } \mu\text{g/ml}$   
6 undiluted) (B) Timeline of vaccine regimen with prime, boosts, ICC, sera collection, and  
7 sacrifice denoted by arrows and the number of weeks after initial prime (week 0).

8

9 **Supplementary Figure 2:** CD107a Membrane Localization (A) Percent of CD107a positive

10 PBMCs after stimulation for 5 hours with 2  $\mu\text{g/ml}$  HIV-1 consensus B Env peptide pool with  
11 background subtraction (n = 10). (B) Percent of CD107a positive PBMCs after stimulation for 5  
12 hours with 2  $\mu\text{g/ml}$  HIV-1 consensus B Gag peptide with background subtraction (n = 10). \*  
13 indicates  $p < 0.05$  when compared to PBS control by either Student's unpaired t-test or Welch's t-  
14 test in cases where F-test indicated unequal variance.

15

16

17

18

19

20

21

22

23

24 Supplementary Figure 1:

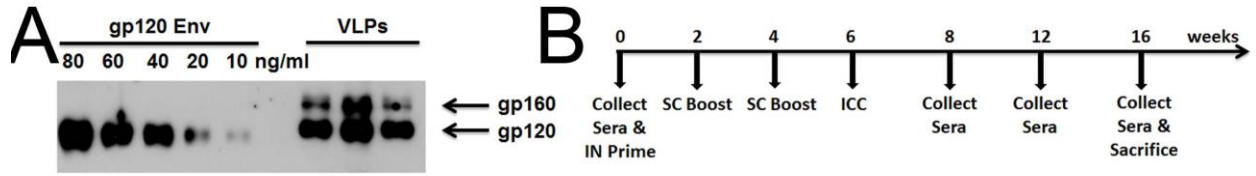

25

26

27

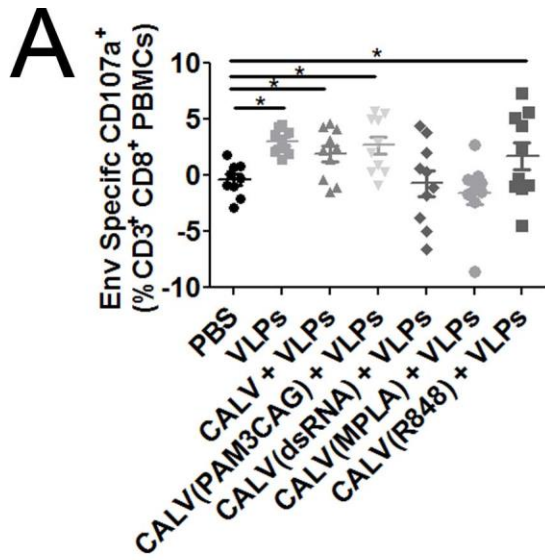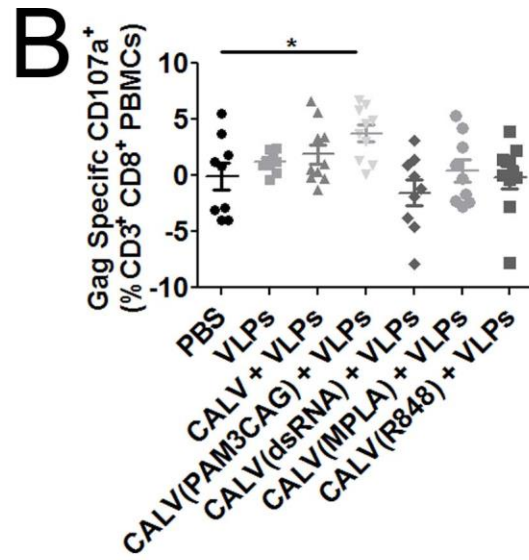

29

30
